# Supplementary material for: Spt6 levels are modulated by PAAF1 and proteasome to regulate the HIV-1 LTR
Source: Springer Nature journal article supplement (doi:10.1186/1742-4690-9-13), 2012-02-08

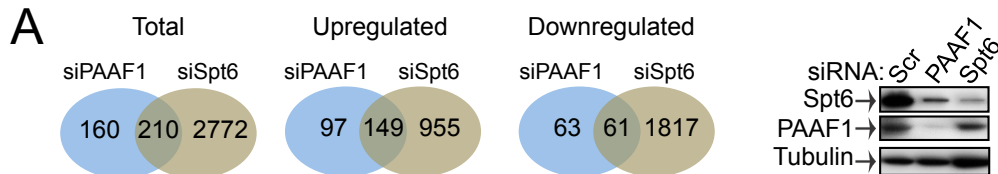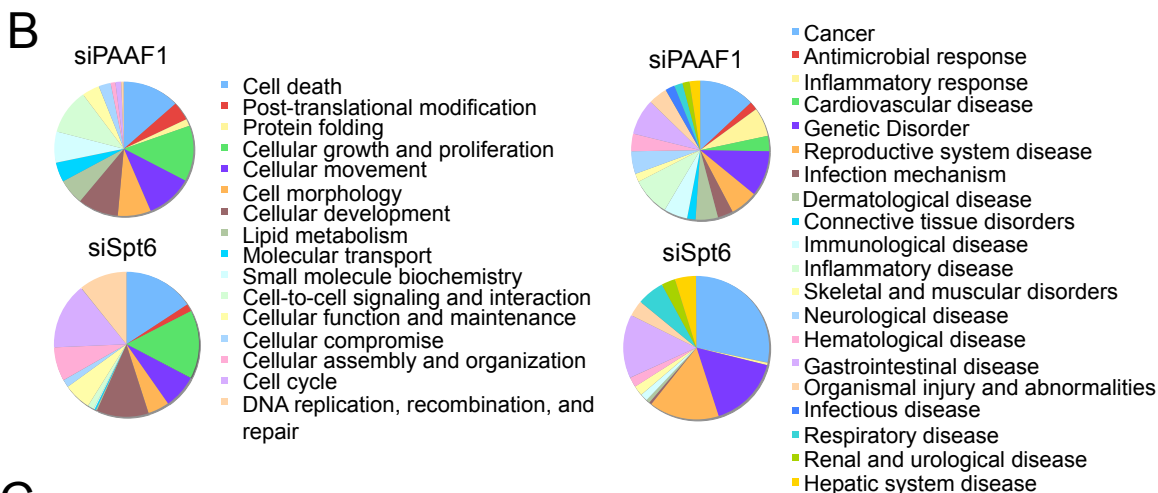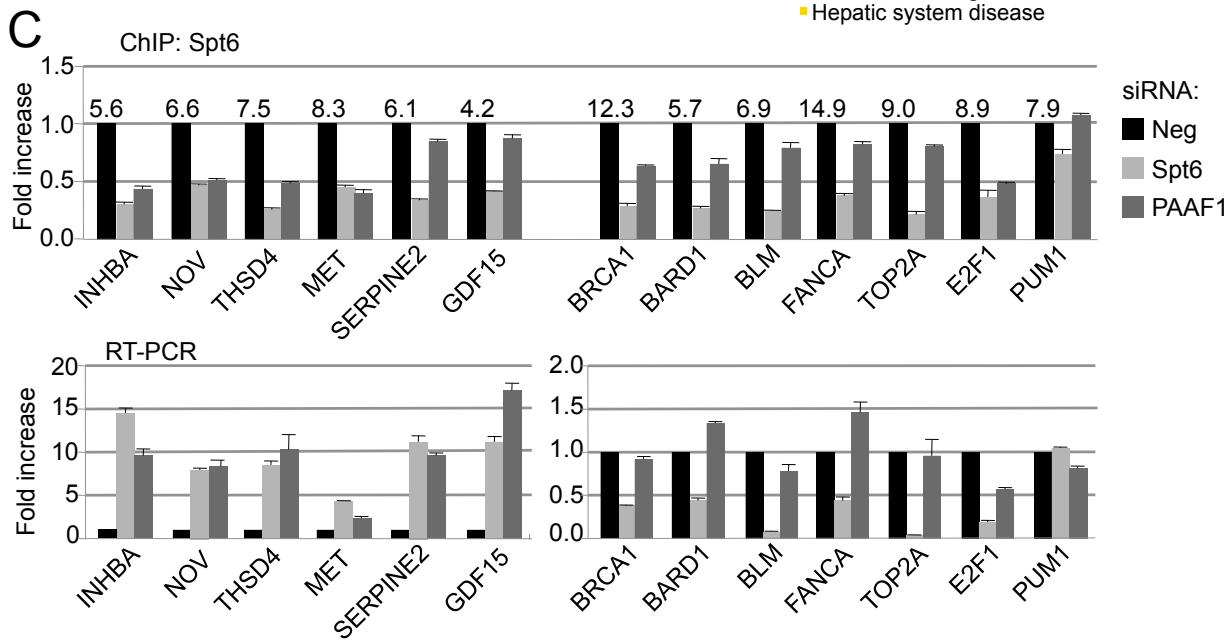

Supplement: 12977_2011_2658_MOESM13_ESM.pdf [file 12977_2011_2658_MOESM13_ESM.pdf]
